# Supplementary material for: Corporate social responsibility disclosure and profitability in GCC banks from a stakeholder perspective
Source: Research Square preprint supplement (doi:10.21203/rs.3.rs-8637213/v1), 2026-02-20
Supplement: Supplementary file 1 [file 7953cb0566d39fba7df4354d.docx]

**Corporate social responsibility disclosure and profitability in GCC banks from a stakeholder perspective**

**Author(s):**

**Dr.Zaroug Osman Bilal**

**Associate Professor, Department of Accounting, College of Commerce and Business Admiration, Dhofar University**

[**zosman@du.edu.om**](mailto:zosman@du.edu.om) **ORCID :0000-0002-5642-6305**

**Dr.Sohail Amjed**

**College of Economics and Business Administration, University of Technology and Applied Sciences, Salalah, Sultanate of Oman.**

**sohail.amjed@utas.edu.om ORCID:0000-0002-2243-1691**

**Dr. Azam Abdelhakeem Khalid**

**Associate Professor, Department of Accounting and Finance, Faculty of Business Management &Professional Studies. Management Sciences University, Malaysia**

abdelhakeem@msu.edu.my **ORCID:0000-0001-8457-6311**

Dr.Tariq Mohamed Salih

**Assistant Professor, Department of Management, College of Commerce and Business Admiration, Dhofar University.**

tariqm@du.edu.om **ORCID:** **0000-0001-6433-3494**
